# Supplementary material for: Selection of Target Sites for Mobile DNA Integration in the Human Genome
Source: PLoS Comput Biol. 2006 Nov 24;2(11):e157. doi: 10.1371/journal.pcbi.0020157 (PMC1664696; doi:10.1371/journal.pcbi.0020157)
Supplement: Table S1 — (55 KB XLS) [file pcbi.0020157.st001.xls]

## Sheet: Sheet1
Set	Expression set	GEO link	Pubmed Link
AAV-Fibro	IMR90-GSE410	http://www.ncbi.nlm.nih.gov/projects/geo/query/acc.cgi?acc=GSE410	http://www.ncbi.nlm.nih.gov/entrez/query.fcgi?db=pubmed&term=15159079
L1-HeLa	HeLa_exp_data	http://www.ncbi.nlm.nih.gov/geo/query/acc.cgi?acc=GSE1417	http://www.ncbi.nlm.nih.gov/entrez/query.fcgi?db=PubMed&term=15026349
L1-HeLa-HCT	HeLa_exp_data	http://www.ncbi.nlm.nih.gov/geo/query/acc.cgi?acc=GSE1417	http://www.ncbi.nlm.nih.gov/entrez/query.fcgi?db=PubMed&term=15026349
SB-HeLa	HeLa_exp_data	http://www.ncbi.nlm.nih.gov/geo/query/acc.cgi?acc=GSE1417	http://www.ncbi.nlm.nih.gov/entrez/query.fcgi?db=PubMed&term=15026349
SB-Huh-7	Liver_GSM18953	http://www.ncbi.nlm.nih.gov/geo/query/acc.cgi?acc=GSM18953	http://www.ncbi.nlm.nih.gov/entrez/query.fcgi?db=PubMed&term=15075390
HIV-SupT1	SupT1	submission underway	http://www.ncbi.nlm.nih.gov/entrez/query.fcgi?DB=pubmed&term=12202041
HIV-Jurkat	Jurkat	http://www.ncbi.nlm.nih.gov/geo/gds/gds_browse.cgi?gds=181	http://www.ncbi.nlm.nih.gov/entrez/query.fcgi?db=PubMed&term=11904358
HIV-IMR90	IMR90-GSE410	http://www.ncbi.nlm.nih.gov/projects/geo/query/acc.cgi?acc=GSE410	http://www.ncbi.nlm.nih.gov/entrez/query.fcgi?db=pubmed&term=15159079
HIV-293T	HeLa_exp_data	http://www.ncbi.nlm.nih.gov/geo/query/acc.cgi?acc=GSE1417	http://www.ncbi.nlm.nih.gov/entrez/query.fcgi?db=PubMed&term=15026349
HIV-Mac	MACGSM27931	http://www.ncbi.nlm.nih.gov/geo/query/acc.cgi?acc=GSM27931	http://www.ncbi.nlm.nih.gov/entrez/query.fcgi?db=PubMed&term=15322539
HIV-PBMC	PBMC	http://www.ncbi.nlm.nih.gov/geo/query/acc.cgi?acc=GSE1407	http://www.ncbi.nlm.nih.gov/entrez/query.fcgi?db=PubMed&term=15314653
ASLV-293T	ledgf293TS	http://www.ncbi.nlm.nih.gov/geo/query/acc.cgi?acc=GSE3485	http://www.ncbi.nlm.nih.gov/entrez/query.fcgi?db=PubMed&term=16311605
ASLV-HeLa	HeLa_exp_data	http://www.ncbi.nlm.nih.gov/geo/query/acc.cgi?acc=GSE1417	http://www.ncbi.nlm.nih.gov/entrez/query.fcgi?db=PubMed&term=15026349
SFV-CD34+	CD34_GSM18885	http://www.ncbi.nlm.nih.gov/geo/query/acc.cgi?acc=GSM18885	http://www.ncbi.nlm.nih.gov/entrez/query.fcgi?db=PubMed&term=15075390
SFV-Fibro	IMR90-GSE410	http://www.ncbi.nlm.nih.gov/projects/geo/query/acc.cgi?acc=GSE410	http://www.ncbi.nlm.nih.gov/entrez/query.fcgi?db=pubmed&term=15159079
MLV-HeLa-NS	HeLa_exp_data	http://www.ncbi.nlm.nih.gov/geo/query/acc.cgi?acc=GSE1417	http://www.ncbi.nlm.nih.gov/entrez/query.fcgi?db=PubMed&term=15026349
MLV-HeLa-S	HeLa_exp_data	http://www.ncbi.nlm.nih.gov/geo/query/acc.cgi?acc=GSE1417	http://www.ncbi.nlm.nih.gov/entrez/query.fcgi?db=PubMed&term=15026349
